# Supplementary material for: Nanoimprinted and Anodized Templates for Large-Scale and Low-Cost Nanopatterning
Source: MDPI journal article supplement (doi:10.3390/nano11123430), 2021-12-17
Supplement: s1 [file s1]

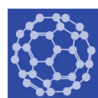

# Nanoimprinted and Anodized Templates for Large-Scale and Low-Cost Nanopatterning

David Navas \*, David G. Trabada and Manuel Vázquez \*

Instituto de Ciencia de Materiales de Madrid, ICMN-CSIC, 28049 Madrid, Spain; davidgonztra@gmail.com

\* Correspondence: david.navas@csic.es (D.N.); mvazquez@icmm.csic.es (M.V.)

Table S1 collects the geometrical parameters, such as periodicity,  $P$ , linewidth,  $w$ , line height,  $h$ , and mold thickness,  $T$ , of the commercial optical disks employed as molds for the imprint step and with indication of whether single polycarbonate, PS, or polycarbonate stamp with metallic layer, PS/ML, were used.

**Table S1.** Geometrical parameters [1]: Polycarbonate section (Pol.): Polycarbonate stamp with metallic layer (PS/ML) or Polycarbonate stamp (PS); periodicity ( $P$ ), linewidth ( $w$ ), line height ( $h$ ) and mold thickness ( $T$ ).

| Optical Disk | Pol.  | P (nm) | W (nm) | h (nm) | T (mm) |
|--------------|-------|--------|--------|--------|--------|
| CD           | PS/ML | 1600   | 600    | 130    | 0.1    |
| CD           | PS    | 1600   | 1000   | 130    | 1.1    |
| DVD          | PS/ML | 740    | 320    | 65     | 0.6    |
| DVD          | PS    | 740    | 420    | 65     | 0.6    |
| BR           | PS/ML | 320    | 130    | 40     | 1.1    |
| BR           | PS    | 320    | 190    | 40     | 0.1    |

SEM images of the PAA nanostructured templates, after a single anodization step of Al substrates and pre-patterned using a CD-PS/ML mold, are shown in Figure S1. PAAs with a single-imprint process exhibit two sets of parallel pores well aligned along the pre-patterning lines and separated by around 400 nm as well as around 800 nm width regions where the pores are randomly grown (see Figure S1 a and b). On the other hand, PAAs with a rhombic geometry also exhibit two sets of parallel pores well aligned along the pre-patterning lines, and a rhombic area with a lateral size of around 500 nm and where pores are mainly growing at the rhomboid edges (in Figure S1 c, d and e).

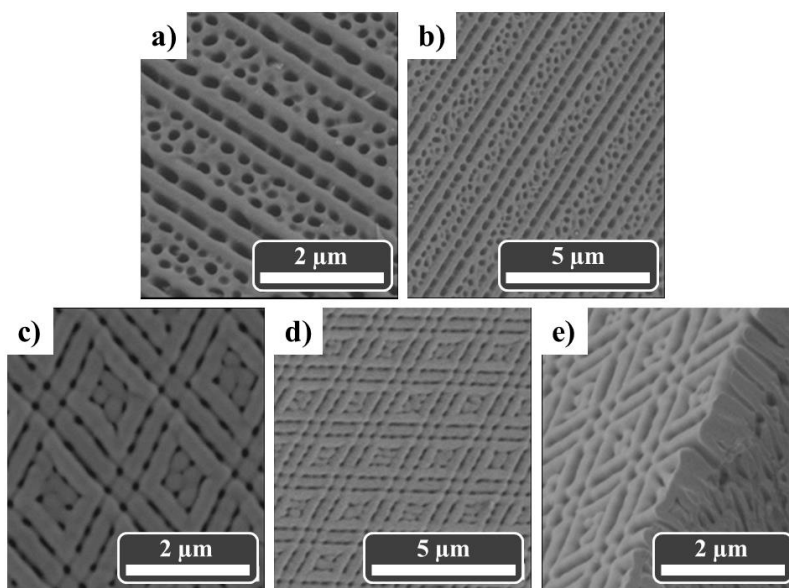

**Figure S1.** Top-view (a-d) and cross section (e) SEM images of PAA templates with line (a and b) and rhombic configurations (c, d and e) imprinted using CD-PS/ML molds and after a single anodization step under a constant voltage of 195 V in 0.03M  $\text{H}_3\text{PO}_4$  acid solution at 5°C and for 2 h.

Figure S2. depicts the SEM images of PAA nanostructured templates with line (a and b), square (c and d) and triangular (e and f) geometrical configurations imprinted using DVD-PS/ML molds and a single anodization step under constant voltage of 165 V in 0.03M  $\text{H}_3\text{PO}_4$  solution at 5°C and for 2 hours.

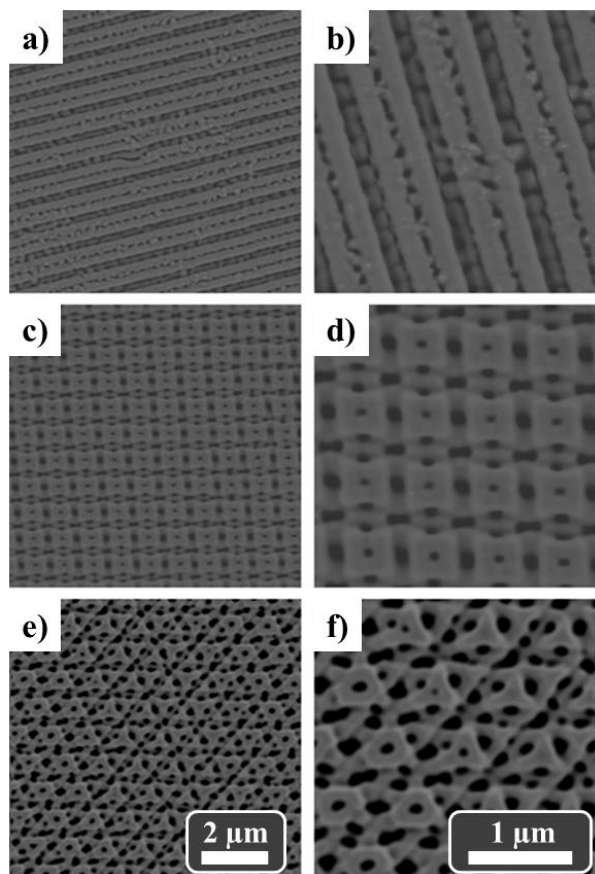

**Figure S2.** Top-view SEM images of PAA templates with line (a and b), square (c and d) and triangular configurations (e and f) imprinted using DVD-PS/ML molds and a single anodization step under constant voltage of 165 V in 0.03M  $\text{H}_3\text{PO}_4$  solution at 5°C and for 2 hours.

Figure S3 shows a free-standing square Co nanostructure after the chemical dissolution of the PAA template in a solution of phosphoric and chromic acids at 50°C for 10 min.

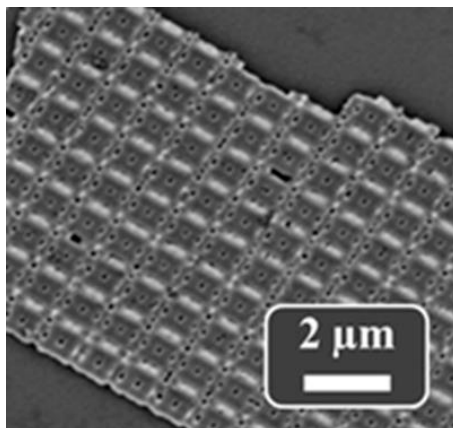

**Figure S3.** SEM image of a free-standing square Co-nanostructure.

Figure S4 shows the XRD patterns of the Co thin films sputtered onto the PAA templates.

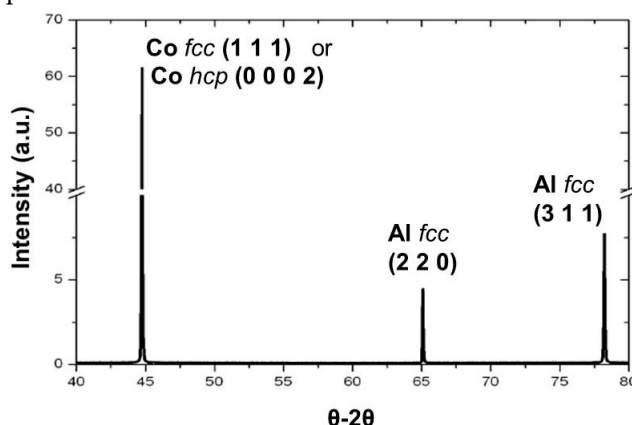

**Figure S4.** XRD pattern of Co nanostructures growth on PAA templates.

Figure S5 a shows the azimuthal or in-plane angular dependence of the VSM hysteresis loops for the Co nanodot array as well as its in-plane coercivity (Figure S 5b) and reduced remanence (Figure S5 c). In this analysis, the 0° orientation corresponds to the direction parallel to the side of the square dot. The hysteresis loops are clearly inclined with regards to the in-plane loops previously described for the arrays of Co nanostripes (see Figure 6 in the main text). In addition, the hysteresis loops do not show any significant evolution with the angular dependence which could be related to a less defined shape anisotropy term. A deeper analysis of the angular dependence of coercivity and remanence suggests the presence of a modest in-plane bi-axial magnetic anisotropy with magnetization easy axes at 90° to each other that can be correlated to the cubic array of squared Co nanodots.

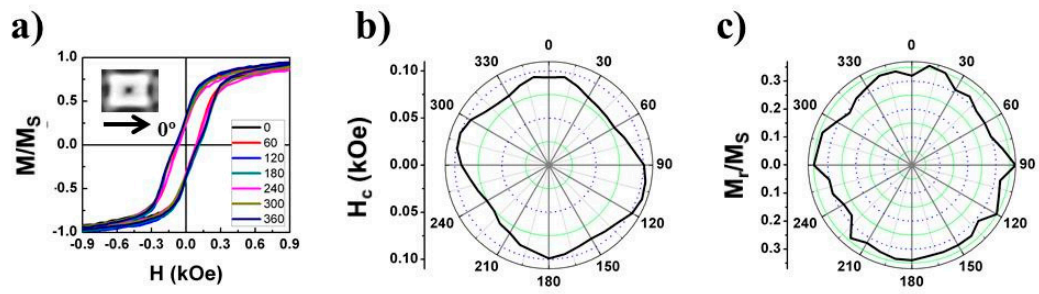

**Figure S5.** In-plane azimuthal VSM hysteresis loops (a) together with the corresponding dependence of coercivity,  $H_c$ , (b) and reduced remanence,  $M_r/M_s$ , (c) for a cubic array of squared Co nanodots.

## References

S1. <http://osta.org/>
